# Supplementary material for: Self-enhanced peroxidase-like activity in a wide pH range enabled by heterostructured Au/MOF nanozymes for multiple ascorbic acid-related bioenzyme analyses
Source: Royal Society of Chemistry journal article supplement (doi:10.1039/d3an00017f), 2023-01-01
Supplement: d3an00017f1.pdf [file d3an00017f1.pdf]

Supporting Information for

**Self-enhanced peroxidase-like activity in a wide pH range enabled by heterostructured Au/MOFs nanozymes for multiple ascorbic acid-related bioenzymes analysis**

*Wendong Liu*<sup>a,#</sup>, *Dingding Zhang*<sup>a,#</sup>, *Fanghua Zhang*<sup>a</sup>, *Zhe Hao*<sup>a</sup>, *Yuyan Li*<sup>a</sup>,

*Mingzheng Shao*<sup>a</sup>, *Ruizhong Zhang*<sup>a\*</sup>, *Xiyan Li*<sup>b\*</sup>, *Libing Zhang*<sup>a\*</sup>

<sup>a</sup> Tianjin Key Laboratory of Molecular Optoelectronic Sciences, Department of Chemistry, Tianjin University, Tianjin 300072 P. R. China

<sup>b</sup> Institute of Photoelectronic Thin Film Devices and Technology, Solar Energy Conversion Center, Key Laboratory of Photoelectronic Thin Film Devices and Technology of Tianjin, Engineering Research Center of Thin Film Photoelectronic Technology of Ministry of Education, Nankai University, Tianjin 300350 P. R. China

<sup>#</sup>Contributed equally.

\*Corresponding author.

E-mail: zhangrz2019@tju.edu.cn (R.Z.); xiyan.li@nankai.edu.cn (X.L.);

libing.zhang@tju.edu.cn (L.Z.)

## Materials and methods

**Reagents and materials.**  $\text{HAuCl}_4$ ,  $\text{CH}_3\text{COOH}$ ,  $\text{CH}_3\text{COONa}$ , 1,2-diaminobenzene (OPD), 2,2'-azino-bis(3-ethylbenzothiazoline-6-sulfonic acid) (ABTS), Acarbose Hydrate were purchased from Shanghai Aladdin Biochemical Technology Co., Ltd. Alkaline phosphatase (ALP), sodium L-ascorbyl-2-phosphate (AAP), ascorbic acid oxidase (AAO) were purchased from Shanghai Maclin Biochemical Technology Co., Ltd.  $\alpha$ -Glucosidase was purchased from Beijing Biotopped Technology Co., Ltd. Sodium hydrogen phosphate dihydrate, sodium dihydrogen phosphate anhydrous were purchased from Sun Chemical Technology (Shanghai) Co., Ltd. 3,3',5,5'-tetramethylbenzidine (TMB) was obtained from Shanghai Adamas Reagent Co., Ltd. Ultrapure water ( $\geq 18 \text{ M}\Omega$ , Millipore) was used in all experiments.

**Instrumentation.** The scanning electron microscopy (SEM) images were conducted using a Hitachi SU8010 scanning electron microscope. Transmission electron microscopy (TEM) measurements were made on a HITACHI H-8100 EM with an accelerating voltage of 200 kV. Autosorb-IQ analyzer was used for the Brunauer–Emmett–Teller (BET) surface area of the samples. All the Ultraviolet-visible (UV–vis) absorption spectra were obtained using UV756CRT (China). XPS measurement was performed on an ESCALAB-MKII spectrometer (VG Co., United Kingdom) with  $\text{Al K}\alpha$  X-ray radiation as the X-ray source for excitation. Powder X-ray diffraction (PXRD) patterns were obtained using a Rigaku Smart Lab. Fourier infrared spectra (FTIR) were recorded on Nicolet is5 (Thermo, USA). Inductively coupled plasma mass spectrometry (ICP-MS) measurements were performed on Agilent 725 (USA) to study the loading of Au in Au/UiO-66 according to the following formula:

$$C_x(\text{mg/kg}) = \frac{C_0(\text{mg/L}) * f * V_0(\text{mL}) * 10^{-3}}{m_0(\text{g}) * 10^{-3}} = \frac{C_1(\text{mg/L}) * V_0(\text{mL}) * 10^{-3}}{m_0(\text{g}) * 10^{-3}}$$

$$W(\%) = \frac{C_x(\text{mg/kg})}{10^6} * 100\%$$

$m_0$ : the quality of samples;  $V_0$ : volume after digestion;  $f$ : dilution ratio;  $C_0$ : the concentration of Au (mg/L);  $C_1$ : concentration of Au in the stock solution of sample digestion solution (mg/L);  $C_x$ : test result of Au concentration (mg/kg).

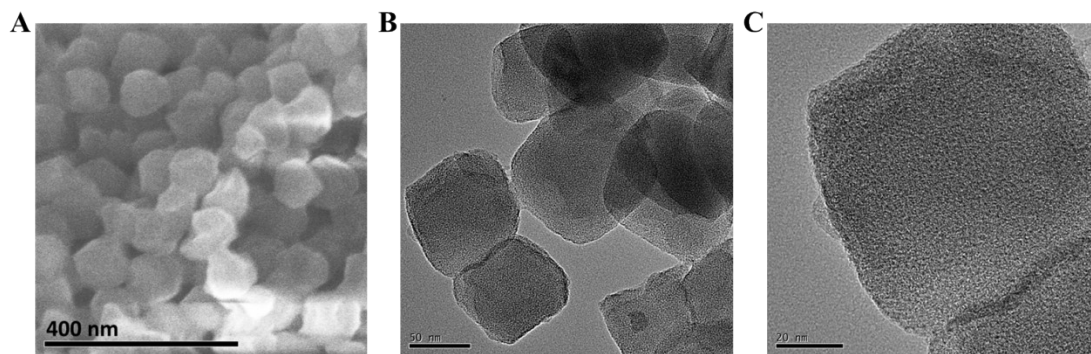

**Fig. S1.** SEM and TEM images of UiO-66 particles. (A) SEM image. (B, C) TEM images.

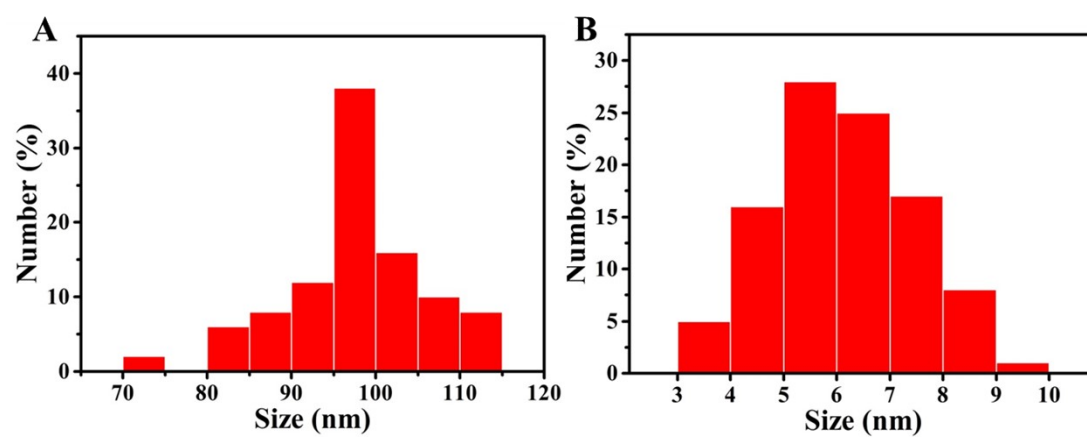

**Fig. S2.** Particle size distribution. (A) UiO-66 particles. (B) Au NPs attached on UiO-66 (1.8 wt %). (C)

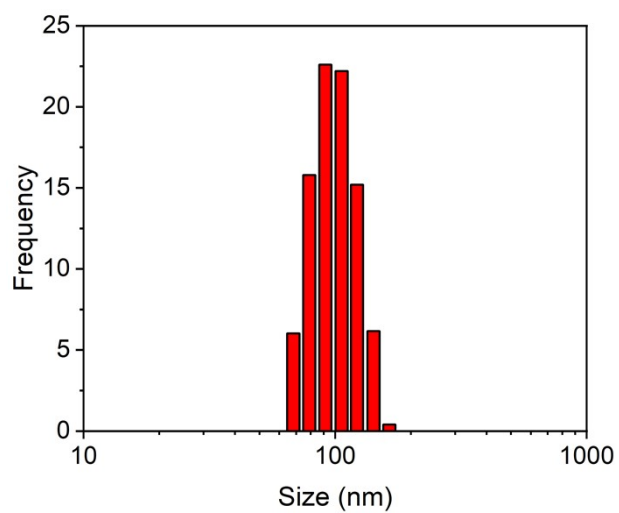

**Fig. S3.** Size distribution of Au NPs/UiO-66 (1.8 wt.% Au) characterized by dynamic light scattering (DLS). The DLS measurement shows that the hydrodynamic size of Au NPs/UiO-66 is approximately 100 nm.

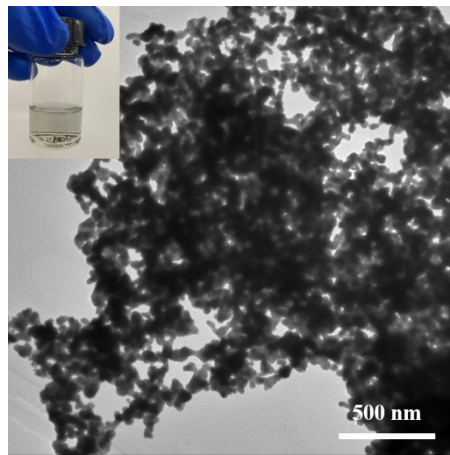

**Fig. S4.** TEM images of Au NPs.

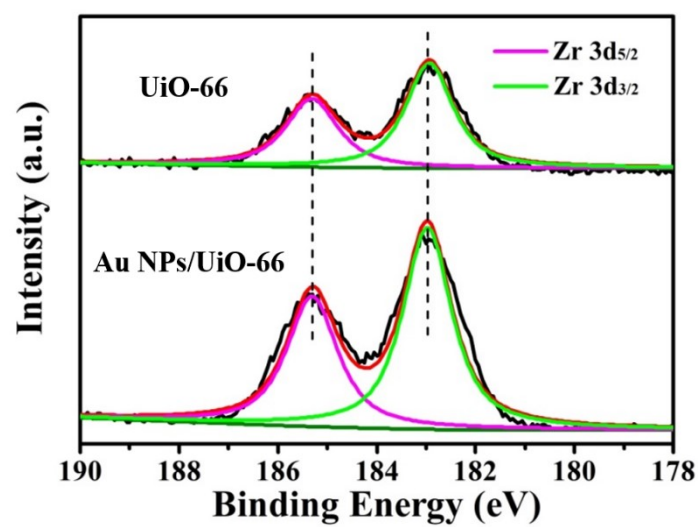

**Fig. S5.** High-resolution XPS spectra of Zr 3d in UiO-66 and Au NPs/UiO-66 particles.

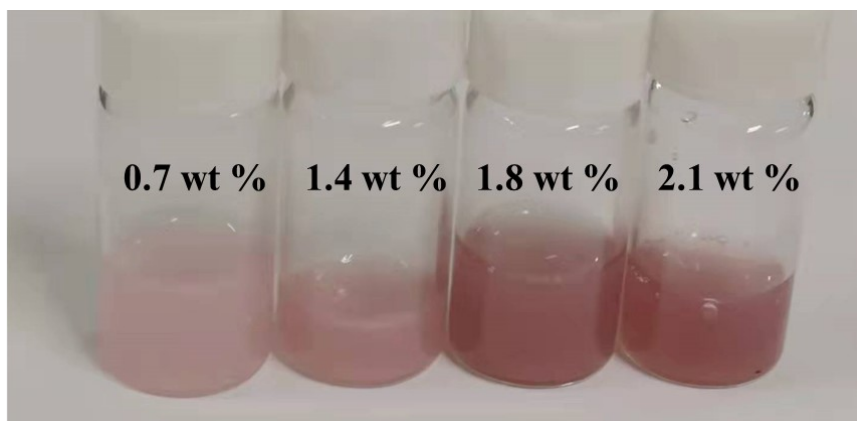

**Fig. S6.** Digital photograph for the aqueous dispersions ( $2 \text{ mg mL}^{-1}$ ) of Au NPs/Uio-66 particles with different Au mass loadings based on the ICP-MS results.



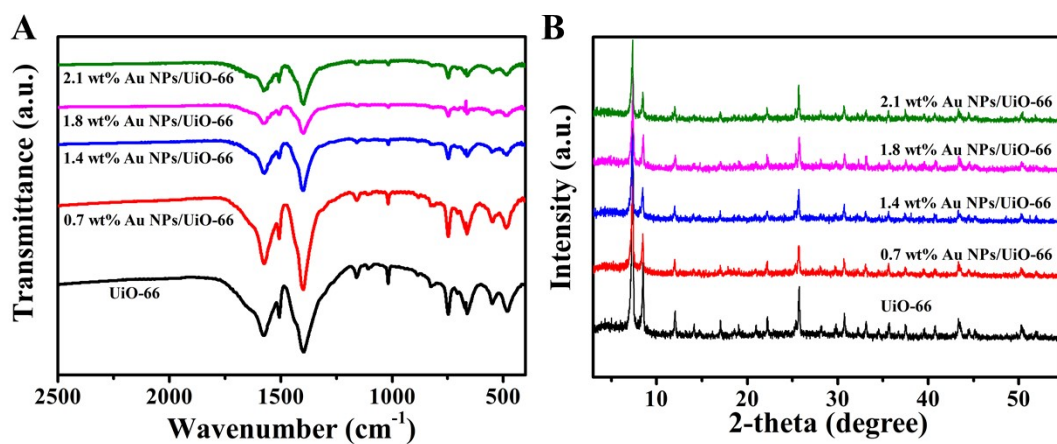

**Fig. S7.** Characterization of the Au NPs/UiO-66 particles with different Au mass loadings. (A) FTIR spectra and (B) PXRD patterns for Au NPs/UiO-66 particles with different Au mass loadings.

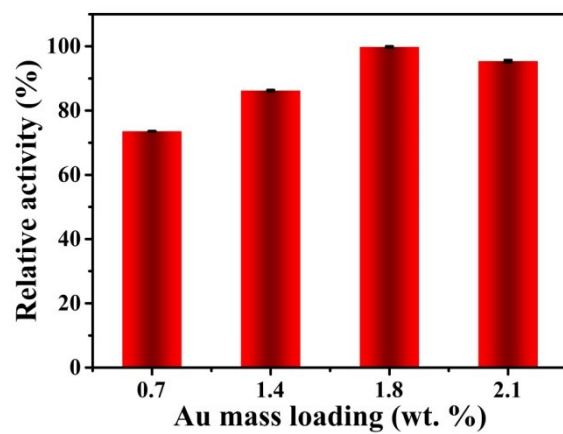

**Fig. S8.** The relative activity of different AuNPs/UiO-66 when the reaction content of Au is the same.

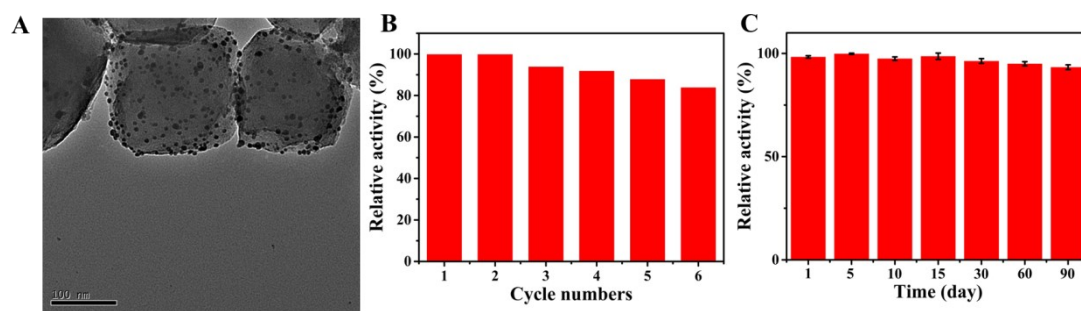

**Fig. S9.** Reusability and stability of Au NPs/UiO-66 nanozyme. (A) TEM image of Au NPs/UiO-66 nanozyme after 6 times of reaction with TMB in the presence of  $H_2O_2$ . (B) The relative activity of Au NPs/UiO-66 nanozyme for 6 consecutive cycles. (C) The relative activity of Au NPs/UiO-66 nanozyme after storage for different times.

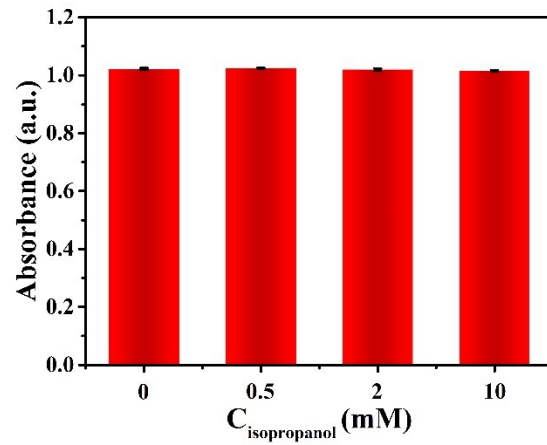

**Fig. S10.** The absorbance of ox-TMB under different concentrations of isopropanol. Reaction conditions: Au NPs/UiO-66 ( $0.1 \text{ mg mL}^{-1}$ ),  $\text{H}_2\text{O}_2$  (25 mM), and TMB (0.5 mM) in acetate buffer (10 mM, pH 5.0).

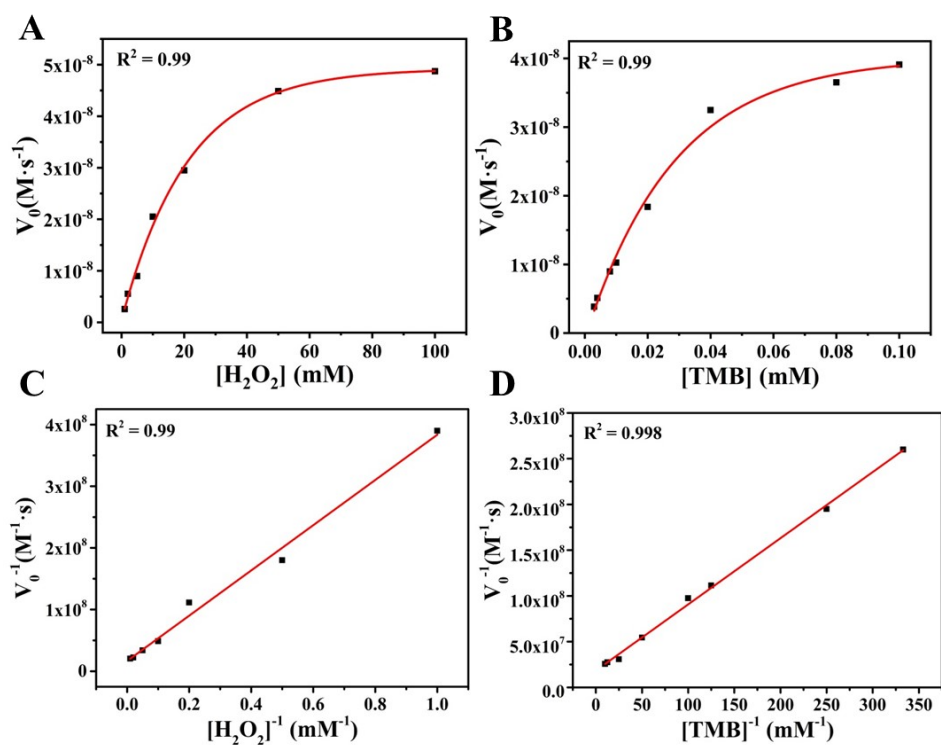

**Fig. S11.** Steady-state kinetic assay of Au NPs/UiO-66 nanozyme. (A) The reaction concentration of TMB (0.5 mM) remained the same and the velocity ( $\lambda_{Abs}=652$  nm) varied with the concentration of  $H_2O_2$ , and (B) the reaction concentration of  $H_2O_2$  (25 mM) remained the same and the velocity ( $\lambda_{Abs}=652$  nm) varied with the concentration of TMB. Double reciprocal plots between velocity and (C)  $H_2O_2$  concentration and (D) TMB concentration. Reaction condition: HAC-NaAc buffer (10 mM, pH 5.0),  $0.1 \text{ mg mL}^{-1}$  nanozyme.

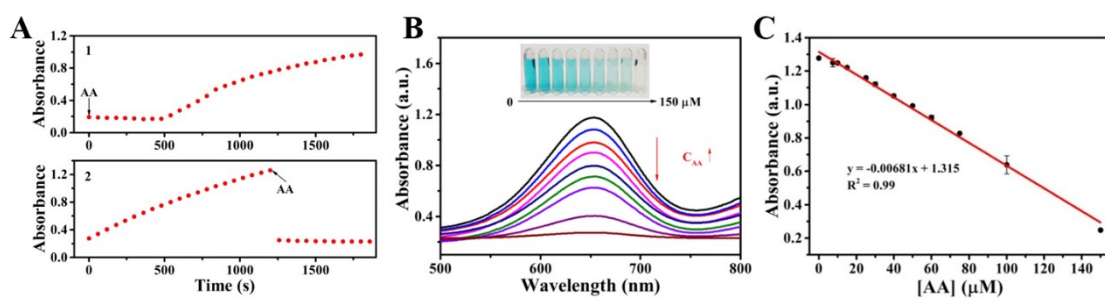

**Fig. S12.** Colorimetric response for AA assay. (A) Kinetic plots of  $A_{652}$  for Au NPs/UiO-66 catalyzed TMB oxidation in the presence of  $H_2O_2$  and AA-mediated inhibitory effect on the peroxidase-like activity of Au NPs/UiO-66. (curve 1: Au NPs/UiO-66 +  $H_2O_2$  + TMB + AA. curve 2: Au NPs/UiO-66 +  $H_2O_2$  + TMB + AA, note: AA injection after 20 min incubation.). (B) UV-vis absorption spectra of the Au NPs/UiO-66- $H_2O_2$ -TMB system with different concentrations of AA (0-150  $\mu$ M). (C) Linear relationship between absorbance at 652 nm and concentrations of AA. Reaction conditions: pH 5, 25 mM  $H_2O_2$ , 0.5 mM TMB, 40  $^{\circ}C$ , 0.1 mg mL $^{-1}$  Au NPs/UiO-66 nanozyme.

**Table S1.** The surface areas and pore volumes of UiO-66 and Au@UiO-66 samples. The pore size model is “N<sub>2</sub> at 77 K on carbon (slit pore, NLDFT equilibrium model)”.

| Samples       | Pore volume (cm <sup>3</sup> g <sup>-1</sup> ) | Surface area (m <sup>2</sup> g <sup>-1</sup> ) | Pore width (Mode) (nm) |
|---------------|------------------------------------------------|------------------------------------------------|------------------------|
| UiO-66        | 0.521                                          | 922.4                                          | 0.822                  |
| Au NPs/UiO-66 | 0.442                                          | 783.1                                          | 0.785                  |

**Table S2.** The mass loading of Au in Au NPs/UiO-66 particles at different concentrations of H<sub>2</sub>AuCl<sub>4</sub>.

| H <sub>2</sub> AuCl <sub>4</sub> (mM) | The load of Au in Au NPs/UiO-66 (wt %) |
|---------------------------------------|----------------------------------------|
| 10                                    | 0.7                                    |
| 20                                    | 1.4                                    |
| 25                                    | 1.8                                    |
| 30                                    | 2.1                                    |



**Table S3.** Catalytic parameters comparison of Au NPs/UiO-66, HRP, and different Au-based catalysts.

| Catalyst               | Substrate                     | $K_m$ (mM) | $V_{max}$ ( $10^{-8}$ M $\cdot$ s $^{-1}$ )<br>1) | [E]<br>(mM) | $K_{cat}$ (s $^{-1}$ ) | Reference |
|------------------------|-------------------------------|------------|---------------------------------------------------|-------------|------------------------|-----------|
| HRP                    | H <sub>2</sub> O <sub>2</sub> | 3.7        | 8.71                                              | -           |                        | 1         |
| HRP                    | TMB                           | 0.434      | 10                                                | -           |                        | 1         |
| Tyr-Au NPs             | H <sub>2</sub> O <sub>2</sub> | 57.84      | 5.32                                              | 0.1         | $5.32 \times 10^{-4}$  | 2         |
| Tyr-Au NPs             | TMB                           | 0.024      | 0.91                                              | 0.1         | $9.1 \times 10^{-5}$   | 2         |
| citrate-Au NPs         | H <sub>2</sub> O <sub>2</sub> | 61.34      | 0.663                                             | 0.02        | $3.315 \times 10^{-4}$ | 3         |
|                        |                               |            |                                                   |             | 4                      |           |
| citrate-Au NPs         | TMB                           | 0.11       | 1.539                                             | 0.02        | $7.695 \times 10^{-4}$ | 3         |
|                        |                               |            |                                                   |             | 4                      |           |
| D-His@Au NCs           | H <sub>2</sub> O <sub>2</sub> | 72         | 5.55                                              | -           |                        | 4         |
| D-His@Au NCs           | TMB                           | 0.41       | 7.69                                              | -           |                        | 4         |
| BSA-Au NCs             | H <sub>2</sub> O <sub>2</sub> | 16.71      | 1.302                                             | 0.003       | $4.34 \times 10^{-3}$  | 5         |
| BSA-Au NCs             | TMB                           | 3.59       | 0.861                                             | 0.003       | $2.87 \times 10^{-3}$  | 5         |
| Au hydrogel            | H <sub>2</sub> O <sub>2</sub> | 19.92      | 12.8                                              | -           | -                      | 6         |
| Au hydrogel            | TMB                           | 0.32       | 12.30                                             | -           | -                      | 6         |
| ZnSA-AuAMP<br>hydrogel | H <sub>2</sub> O <sub>2</sub> | 30.53      | 1.679                                             | -           | -                      | 7         |
| ZnSA-AuAMP<br>hydrogel | TMB                           | 0.36       | 1.197                                             | -           | -                      | 7         |
| Au NPs/UiO-66          | H <sub>2</sub> O <sub>2</sub> | 21.915     | 5.974                                             | 0.005       | 0.012                  | This work |
| Au NPs/UiO-66          | TMB                           | 0.039      | 5.453                                             | 0.005       | 0.011                  | This work |

[E] is the molar concentration of Au;  $K_{cat}$  is the catalytic constant,  $K_{cat} = V_{max}/[E]$ .

**Table S4.** Comparison of different optical  $\alpha$ -Glu assays.

| Materials     | Mode        | Linear range (U/mL)     | LOD (U/mL) | Reference |
|---------------|-------------|-------------------------|------------|-----------|
| Au NRs        | Colorimetry | 2.5-45                  | 0.5        | 8         |
| SA-Pt/CN      | Colorimetry | 0.01-8                  | 0.0038     | 9         |
| f-FeNC        | Colorimetry | 0.005-0.04,<br>0.04-0.1 | 0.00027    | 10        |
| pAPG AuNPs    | Colorimetry | 0.05-1.1                | 0.04       | 11        |
| CDs           | Fluorometry | 0.01-5.5                | 0.02       | 12        |
| b-CDs         | Fluorometry | 0.13-6.7                | 0.036      | 13        |
| F-PDA-CoOOH   | Fluorometry | 0.002-0.08              | 0.00165    | 14        |
| PBA-CQD       | Fluorometry | 1.14-17.35              | 0.33       | 15        |
| b-CDs         | Fluorometry | 0.13-6.7                | 0.036      | 13        |
| AgInZnS QDs   | Fluorometry | 0.01-0.16               | 0.0073     | 16        |
| Au NPs UiO-66 | Colorimetry | 0.005-1.9               | 0.002      | This work |

**Table S5.** Comparison of different optical ALP assays.

| Materials                 | Mode             | Linear range (mU/mL) | LOD (mU/mL) | Reference |
|---------------------------|------------------|----------------------|-------------|-----------|
| Fe/NC-SAs                 | Colorimetry      | 0.1-1.5              | 0.05        | 17        |
| PB NCs                    | Colorimetry      | 0.6-6.0              | 0.23        | 18        |
| Ir/LMIO                   | Colorimetry      | 0.39-100             | 0.39        | 19        |
| Pd cube@CeO <sub>2</sub>  | Colorimetry      | 0.1-4                | 0.07        | 20        |
| Ag@Au NR                  | Colorimetry      | 2-20                 | 0.53        | 21        |
| Ferrocene-based substrate | Electrochemistry | 1-1000               | 0.4         | 22        |
| 4-MPBAb-Au@Ag NPs         | SERS             | 0.5-10               | 0.1         | 23        |
| CdS QDs                   | Fluorimetry      | 0.2-30               | 0.2         | 24        |
| b-CD/CQDs                 | Fluorometry      | 3.4-100              | 0.9         | 25        |
| NB co-doped C-dots        | Fluorometry      | 0.2-6.0              | 0.16        | 26        |
| Au NPs/UiO-66             | Colorimetry      | 1.25-37.5            | 0.14        | This work |

**Table S6.** Comparison of different optical ALP assays.

| Materials       | Mode         | Linear range<br>(mU/mL) | LOD<br>(mU/mL) | Reference |
|-----------------|--------------|-------------------------|----------------|-----------|
| C-dots          | Colorimetry  | 0.04–8                  | 0.012          | 27        |
| Au/Ag NCs       | Fluorometric | 5-80                    | 1.72           | 28        |
| DNA-Au/Ag<br>NC | Fluorimetry  | 10-200                  | 4.8            | 29        |
| MQDs            | Fluorimetry  | 2-40                    | 0.8            | 30        |
| Carbon dots     | Fluorimetry  | 0.04-5                  | 0.017          | 27        |
| Au NPs UiO-66   | Colorimetry  | 0.5-10                  | 0.34           | This work |

## References

1. Gao, L.; Zhuang, J.; Nie, L.; Zhang, J.; Zhang, Y.; Gu, N.; Wang, T.; Feng, J.; Yang, D.; Perrett, S.; Yan, X., Intrinsic peroxidase-like activity of ferromagnetic nanoparticles. *Nature Nanotechnology* **2007**, *2* (9), 577-583.
2. Weerathunge, P.; Ramanathan, R.; Torok, V. A.; Hodgson, K.; Xu, Y.; Goodacre, R.; Behera, B. K.; Bansal, V., Ultrasensitive Colorimetric Detection of Murine Norovirus Using NanoZyme Aptasensor. *Anal Chem* **2019**, *91* (5), 3270-3276.
3. Xue, Q.; Niu, X.; Liu, P.; Wang, M.; Peng, Y.; Peng, H.; Li, X., Analyte-triggered citrate-stabilized Au nanoparticle aggregation with accelerated peroxidase-mimicking activity for catalysis-based colorimetric sensing of arsenite. *Sensors and Actuators B: Chemical* **2021**, 334.
4. Song, Y.; Qiao, J.; Liu, W.; Qi, L., Colorimetric detection of serum doxycycline with d-histidine-functionalized gold nanoclusters as nanozymes. *Analyst* **2020**, *145* (10), 3564-3568.
5. Hu, L.; Liao, H.; Feng, L.; Wang, M.; Fu, W., Accelerating the Peroxidase-Like Activity of Gold Nanoclusters at Neutral pH for Colorimetric Detection of Heparin and Heparinase Activity. *Anal Chem* **2018**, *90* (10), 6247-6252.
6. Jiao, L.; Xu, W.; Yan, H.; Wu, Y.; Gu, W.; Li, H.; Du, D.; Lin, Y.; Zhu, C., A dopamine-induced Au hydrogel nanozyme for enhanced biomimetic catalysis. *Chem. Commun.* **2019**, *55* (66), 9865-9868.
7. Liu, L.; Jiang, H.; Wang, X., Alkaline phosphatase-responsive Zn<sup>2+</sup> double-triggered nucleotide capped gold nanoclusters/ alginate hydrogel with recyclable nanozyme capability. *Biosens. Bioelectron.* **2021**, *173*, 112786.
8. Cheng, X.; Huang, Y.; Yuan, C.; Dai, K.; Jiang, H.; Ma, J., Colorimetric detection of  $\alpha$ -glucosidase activity based on the etching of gold nanorods and its application to screen anti-diabetic drugs. *Sens. Actuators, B* **2019**, *282*, 838-843.
9. Kang, G.; Liu, W.; Liu, F.; Li, Z.; Dong, X.; Chen, C.; Lu, Y., Single-atom Pt catalysts as oxidase mimic for p-benzoquinone and  $\alpha$ -glucosidase activity detection. *Chem. Eng. J.* **2022**, *449*, 137855.
10. Zhang, C.; Chen, C.; Zhao, D.; Kang, G.; Liu, F.; Yang, F.; Lu, Y.; Sun, J., Multienzyme Cascades Based on Highly Efficient Metal–Nitrogen–Carbon Nanozymes for Construction of Versatile Bioassays. *Anal. Chem.* **2022**, *94* (8), 3485-3493.
11. Zhang, J.; Liu, Y.; Lv, J.; Li, G., A colorimetric method for  $\alpha$ -glucosidase activity assay and its inhibitor screening based on aggregation of gold nanoparticles induced by specific recognition between phenylenediboronic acid and 4-aminophenyl- $\alpha$ -d-glucopyranoside. *Nano Res.* **2015**, *8* (3), 920-930.
12. Liu, Y.; Liu, W.-J.; Hu, J.; Li, Y.; Wang, Y.; Zhao, L.-X., Affinity binding-mediated

fluorometric protein assay based on the use of target-triggered DNA assembling probes and aptamers labelled with upconversion nanoparticles: application to the determination of platelet derived growth factor-BB. *Microchim. Acta* **2019**, *187* (1), 9.

13. Cheng, X.; Xu, J.; Wang, L.; Xu, G.; Wei, F.; Chai, Y.; Hu, Q.; Cen, Y., A redox modulated ratiometric fluorometric method based on the use of dual-color carbon dots for determination of the activity of enzymes participating in ascorbic acid-related reactions. *Microchim. Acta* **2019**, *186* (12), 818.

14. Zhang, H.; Wang, Z.; Yang, X.; Li, Z.-L.; Sun, L.; Ma, J.; Jiang, H., The determination of  $\alpha$ -glucosidase activity through a nano fluorescent sensor of F-PDA-CoOOH. *Anal. Chim. Acta* **2019**, *1080*, 170-177.

15. Ao, H.; Feng, H.; Huang, X.; Zhao, M.; Qian, Z., A reversible fluorescence nanoswitch based on dynamic covalent B–O bonds using functional carbon quantum dots and its application for  $\alpha$ -glucosidase activity monitoring. *Journal of Materials Chemistry C* **2017**, *5* (11), 2826-2832.

16. Zhang, J.; Liu, J.; Wang, M.; Wang, G.; Su, X., A fluorometric assay for  $\alpha$ -glucosidase activity based on quaternary AgInZnS QDs. *Microchim. Acta* **2021**, *188* (7), 227.

17. Xie, X.; Wang, Y.; Zhou, X.; Chen, J.; Wang, M.; Su, X., Fe–N–C single-atom nanozymes with peroxidase-like activity for the detection of alkaline phosphatase. *Analyst* **2021**, *146* (3), 896-903.

18. Wu, T.; Hou, W.; Ma, Z.; Liu, M.; Liu, X.; Zhang, Y.; Yao, S., Colorimetric determination of ascorbic acid and the activity of alkaline phosphatase based on the inhibition of the peroxidase-like activity of citric acid-capped Prussian Blue nanocubes. *Microchim. Acta* **2019**, *186* (2), 123.

19. Jiang, X.; Wang, X.; Lin, A.; Wei, H., In Situ Exsolution of Noble-Metal Nanoparticles on Perovskites as Enhanced Peroxidase Mimics for Bioanalysis. *Anal. Chem.* **2021**, *93* (14), 5954-5962.

20. Wang, J.; Ni, P.; Chen, C.; Jiang, Y.; Zhang, C.; Wang, B.; Cao, B.; Lu, Y., Colorimetric determination of the activity of alkaline phosphatase by exploiting the oxidase-like activity of palladium cube@CeO<sub>2</sub> core-shell nanoparticles. *Microchimica Acta* **2020**, *187* (2), 115.

21. Zhang, Q.; Yu, Y.; Yun, X.; Luo, B.; Jiang, H.; Chen, C.; Wang, S.; Min, D., Multicolor Colorimetric Sensor for Detection of Omethoate Based on the Inhibition of the Enzyme-Induced Metallization of Gold Nanorods. *ACS Applied Nano Materials* **2020**, *3* (6), 5212-5219.

22. Goggins, S.; Naz, C.; Marsh, B. J.; Frost, C. G., Ratiometric electrochemical detection of alkaline phosphatase. *Chem. Commun.* **2015**, *51* (3), 561-564.

23. Zhang, J.; He, L.; Zhang, X.; Wang, J.; Yang, L.; Liu, B.; Jiang, C.; Zhang, Z.,

Colorimetric and SERS dual-readout for assaying alkaline phosphatase activity by ascorbic acid induced aggregation of Ag coated Au nanoparticles. *Sens. Actuators B Chem.* **2017**, *253*, 839-845.

24. Malashikhina, N.; Garai-Ibabe, G.; Pavlov, V., Unconventional Application of Conventional Enzymatic Substrate: First Fluorogenic Immunoassay Based on Enzymatic Formation of Quantum Dots. *Anal. Chem.* **2013**, *85* (14), 6866-6870.

25. Tang, C.; Qian, Z.; Huang, Y.; Xu, J.; Ao, H.; Zhao, M.; Zhou, J.; Chen, J.; Feng, H., A fluorometric assay for alkaline phosphatase activity based on  $\beta$ -cyclodextrin-modified carbon quantum dots through host-guest recognition. *Biosens. Bioelectron.* **2016**, *83*, 274-280.

26. Ni, P.; Xie, J.; Chen, C.; Jiang, Y.; Lu, Y.; Hu, X., Fluorometric determination of the activity of alkaline phosphatase and its inhibitors based on ascorbic acid-induced aggregation of carbon dots. *Microchimica Acta* **2019**, *186* (3), 202.

27. Wang, Y.; Yang, Y.; Liu, W.; Ding, F.; Zou, P.; Wang, X.; Zhao, Q.; Rao, H., A carbon dot-based ratiometric fluorometric and colorimetric method for determination of ascorbic acid and of the activity of ascorbic acid oxidase. *Microchimica Acta* **2019**, *186* (4), 246.

28. Wang, M.; Wang, M.; Wang, G.; Su, X., A fluorescence “off–on–off” sensing platform based on bimetallic gold/silver nanoclusters for ascorbate oxidase activity monitoring. *Analyst* **2020**, *145* (3), 1001-1007.

29. Liu, S.; Pang, S., A dual-model strategy for fluorometric determination of ascorbic acid and of ascorbic acid oxidase activity by using DNA-templated gold-silver nanoclusters. *Microchimica Acta* **2018**, *185* (9).

30. Li, N.; Zhang, F.; Sun, W.; Zhang, L.; Su, X., Redox reaction-modulated fluorescence biosensor for ascorbic acid oxidase assay by using MoS<sub>2</sub> quantum dots as fluorescence probe. *Talanta* **2021**, *222*, 121522.
